# Supplementary material for: SHORT-ROOT Controls Cell Elongation in the Etiolated Arabidopsis Hypocotyl
Source: PubMed Central journal article supplement — Mol Cells. 2022 Jan 20;45(4):243–56. doi: 10.14348/molcells.2021.5008 (PMC9001151; doi:10.14348/molcells.2021.5008), 2022-01-20
Supplement: molce-45-4-243-supple.pdf [file molce-45-4-243-supple.pdf]

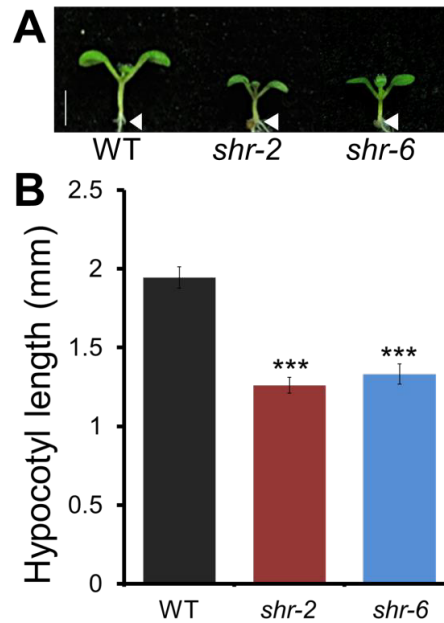

**Supplementary Fig. S1. SHR is also necessary for cell elongation in the light-grown *Arabidopsis* hypocotyl.** (A) Hypocotyls of 7-day-old light-grown WT, *shr-2*, and *shr-6* seedlings. The white arrowheads indicate the hypocotyl-root junction of the seedlings. Scale bar = 2 mm. (B) Hypocotyl lengths of the light-grown WT, *shr-2*, and *shr-6* seedlings. The data are shown as mean  $\pm$  SEM ( $n > 30$ ). Statistical significance was determined by Student's *t*-test compared with the WT. \*\*\* $P < 0.001$ .

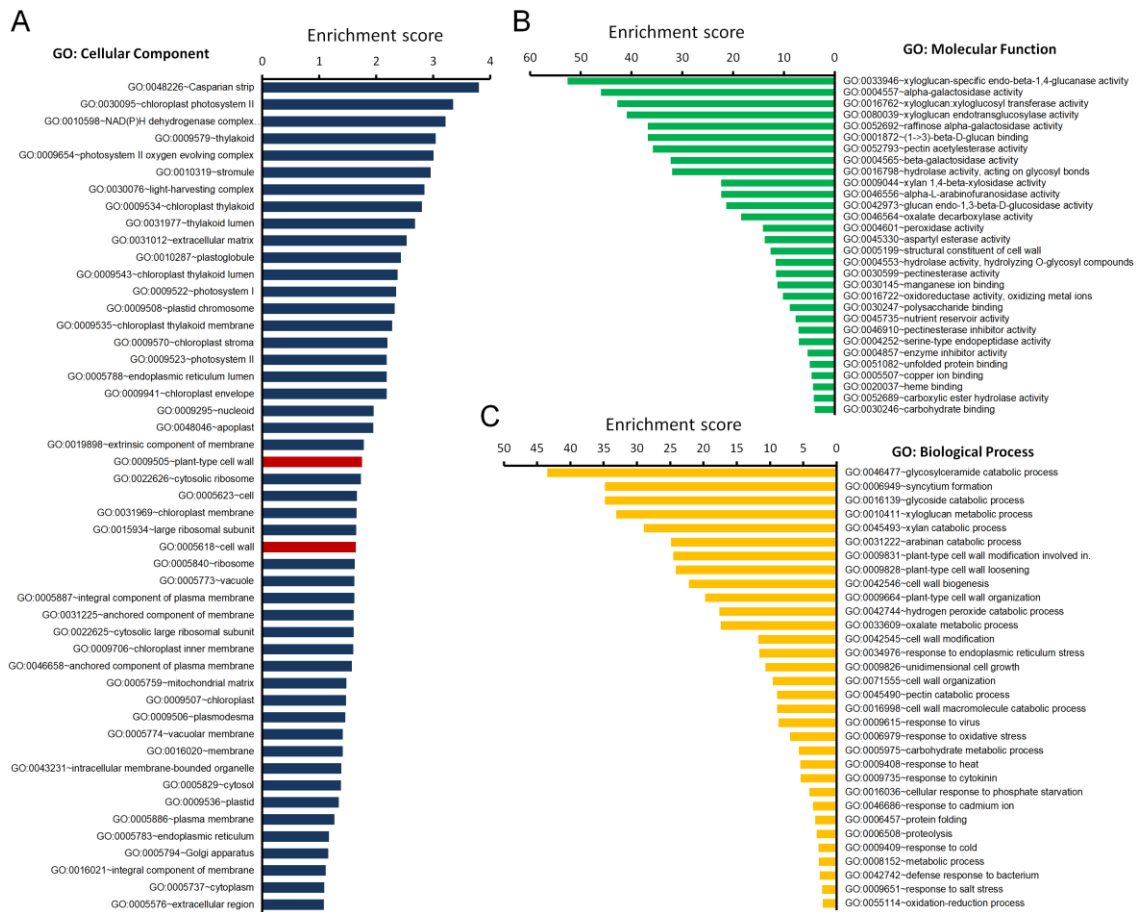

**Supplementary Fig. S2. Gene Ontology (GO) analysis of the SHR-regulated DEGs.** (A) The enrichment scores of DEGs (fold change > 1.5 and  $P < 0.05$ ) were categorized according to “Cellular Component” GO terms. The DEGs in cell wall categories are highlighted in red. (B and C) The DEGs in the cell wall categories were further analyzed according to “Molecular Function” (B) and “Biological Process” (C) terms.

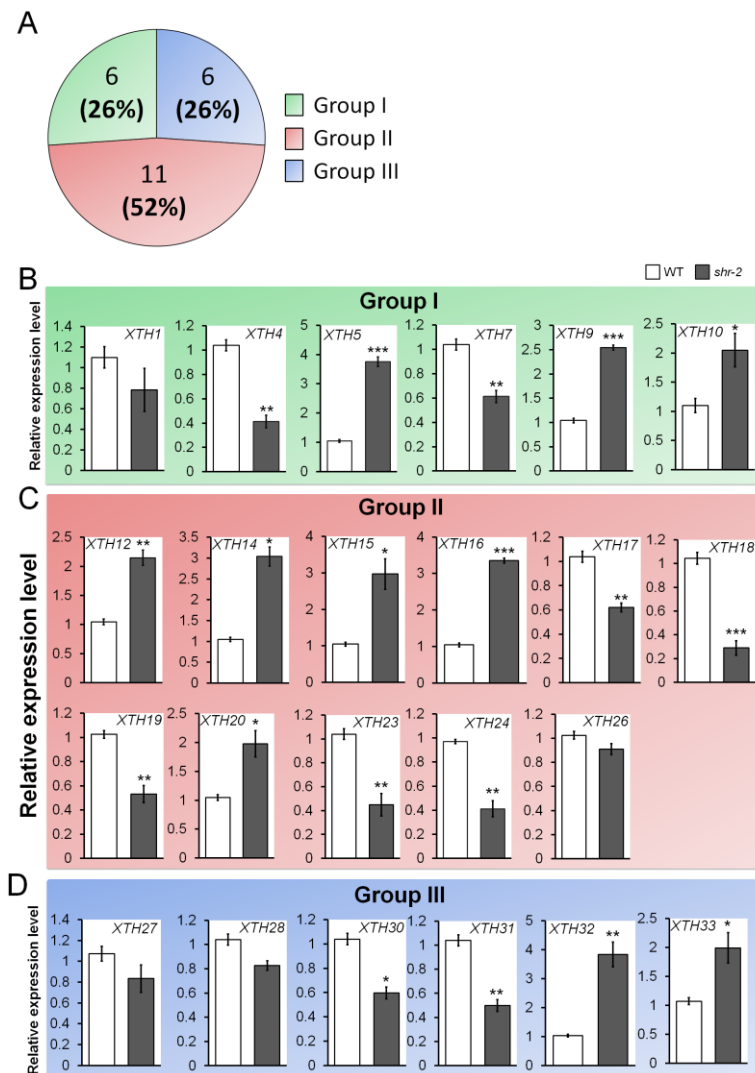

**Supplementary Fig. S3. Expression analysis of the putative SHR-regulated *XTH* genes in the hypocotyls of 6-day-old etiolated WT and *shr-2* seedlings.** (A) The pie chart indicates the numbers of the putative SHR-regulated *XTH* genes in the three groups (group I to III) obtained from our genome-wide transcriptome analyses (ATH1 microarrays and RNA-Seq). (B-D) The relative expression levels of group I (B), group II (C), and group III (D) *XTH* genes in the hypocotyls of 6-day-old etiolated WT and *shr-2* seedlings. *ACTIN2* was used as an internal control. The data are shown as mean  $\pm$  SEM of three biological replicates. Statistical significance of differences was determined by Student's *t*-test compared with the WT control. \* $P < 0.05$ ; \*\* $P < 0.01$ ; \*\*\* $P < 0.001$ .

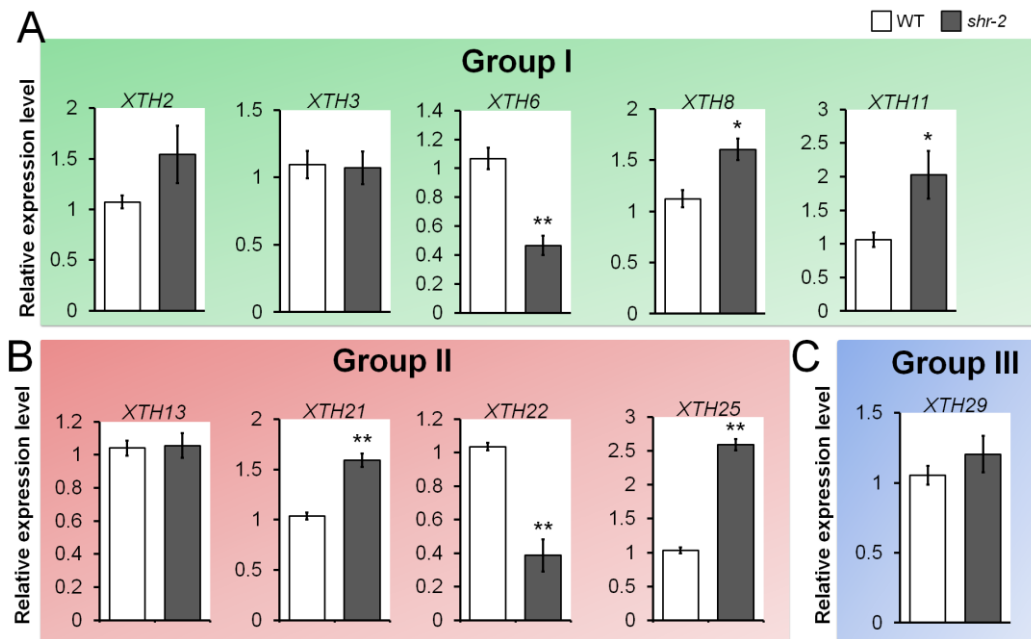

**Supplementary Fig. S4. Expression analysis of the remaining putative SHR-regulated *XTH* genes.** (A-C) The relative expression levels of group I (A), group II (B), and group III (C) *XTH* genes in the hypocotyls of 6-day-old etiolated WT and *shr-2* seedlings. These *XTH* genes were not identified from our initial transcriptome analysis. *ACTIN2* was used as an internal control. The data are shown as mean  $\pm$  SEM of three biological replicates. Statistical significance was determined by Student's *t*-test compared with the WT control. \* $P < 0.05$ ; \*\* $P < 0.01$ .

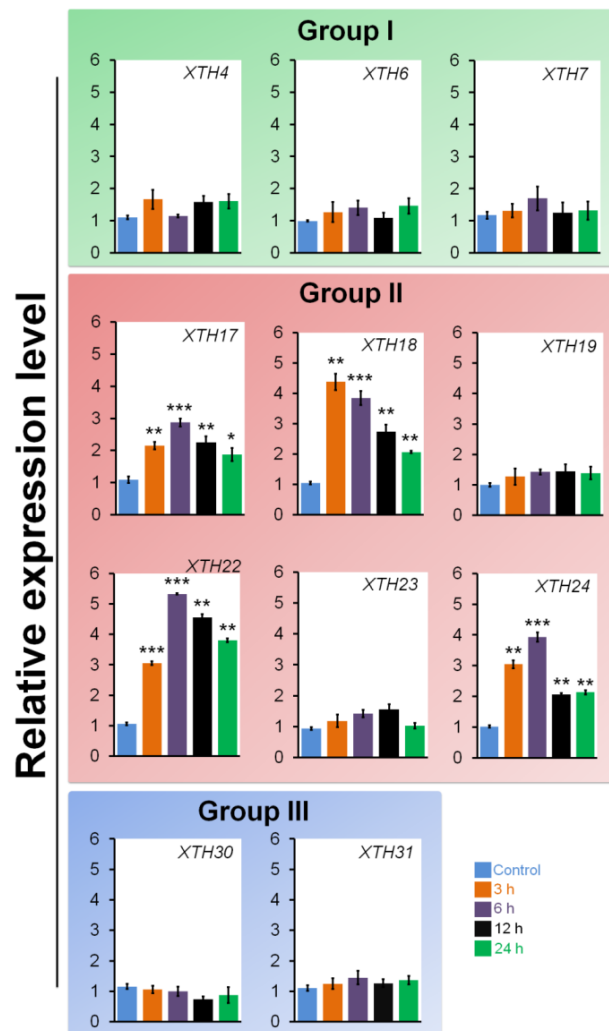

**Supplementary Fig. S5. Expression analysis of the 11 candidate XTH genes upon SHR induction.** The down-regulated 11 XTH genes (3 in group I, 6 in group II, and 2 in group III) in the *shr-2* hypocotyl were reanalyzed in the etiolated *ProSHR::SHR-GR;shr-2* hypocotyls after 10  $\mu$ M DEX treatment at different time points. The levels of XTH17, XTH18, XTH22, and XTH24 transcripts were evidently promoted upon SHR induction. The data are shown as mean  $\pm$  SEM of three biological replicates. Statistical significance was determined by Student's *t*-test compared with the ethanol-treated control. \* $P < 0.05$ ; \*\* $P < 0.01$ ; \*\*\* $P < 0.001$ .

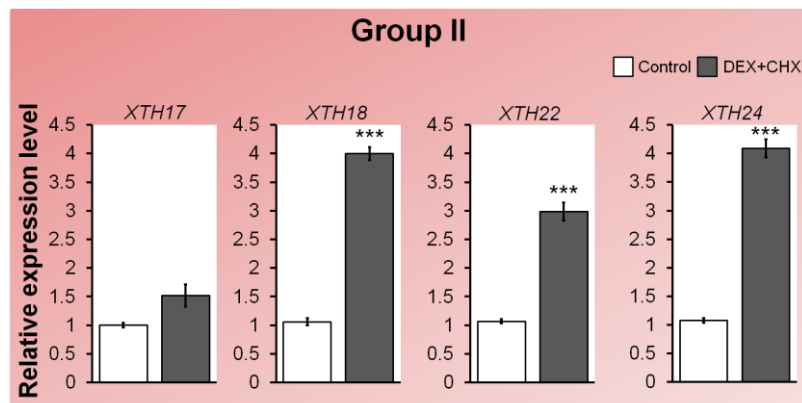

**Supplementary Fig. S6. Expression analysis of the candidate XTH genes upon SHR induction under DEX and CHX treatments.** The transcript levels of the three group II XTH genes (XTH18, XTH22, and XTH24) were elevated in the presence of 10  $\mu$ M DEX and CHX (DEX + CHX). The level of XTH17 expression was not significantly altered in the *ProSHR::SHR-GR;shr-2* hypocotyl under the DEX + CHX condition at 6 h. The data are shown as mean  $\pm$  SEM of three biological replicates. Statistical significance was determined by Student's *t*-test compared with the ethanol-treated control. \*\*\**P* < 0.001.

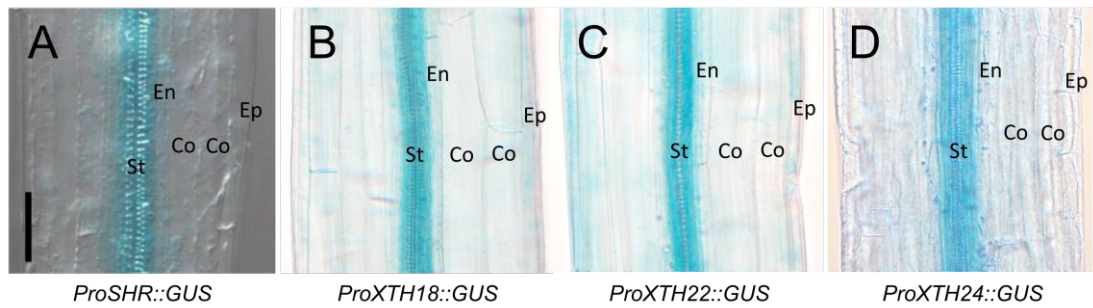

**Supplementary Fig. S7. Expression of *XTH18*, *XTH22*, and *XTH24* is detected in the hypocotyl stele.** (A-D) The GUS staining patterns of *ProSHR::GUS* (A), *ProXTH18::GUS* (B), *ProXTH22::GUS* (C), and *ProXTH24::GUS* (D) in the 6-day-old etiolated hypocotyls. The expression domains of the three *XTH* genes were largely overlapped with the *SHR* pattern. The epidermis (Ep), cortex (Co), endodermis (En), and stele (St) are indicated. Scale bar = 70 μm.

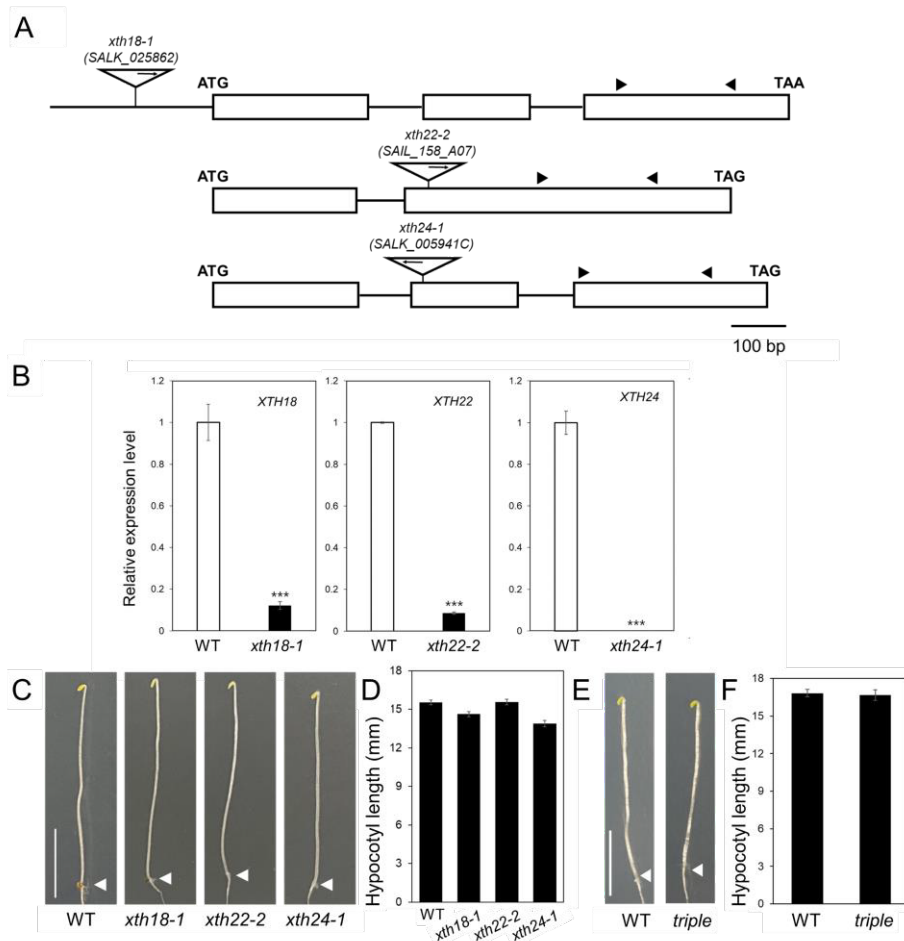

**Supplementary Fig. S8. Isolation and characterization of *xth18*, *xth22*, and *xth24* reveal that the loss-of-function mutants show no visible phenotypes in the etiolated hypocotyl.** (A) The location of T-DNA insertions in the *XTH18*, *XTH22*, and *XTH24* loci. The white boxes represent the coding regions, whereas the lines depict the non-coding regions of the locus. The inverted triangle represents the T-DNA insertion in each *XTH* locus. Black arrowheads indicate the qPCR primer regions of *XTH18*, *XTH22*, and *XTH24*. (B) The transcript levels of *XTH18*, *XTH22*, and *XTH24* in the 6-day-old etiolated WT and mutant hypocotyls. Statistical significance was determined by Student's *t*-test compared with the WT. \*\*\**P* < 0.001. (C and D) Hypocotyl growth of the 6-day-old etiolated WT, *xth18*, *xth22*, and *xth24* seedlings. (E and F) Hypocotyl growth of the etiolated WT and triple mutant (*xth18 xth22 xth24*) seedlings. The white arrowheads indicate the hypocotyl-root junction of the seedlings. The data are shown as mean ± SEM (*n* > 30). Scale bar = 5 mm.



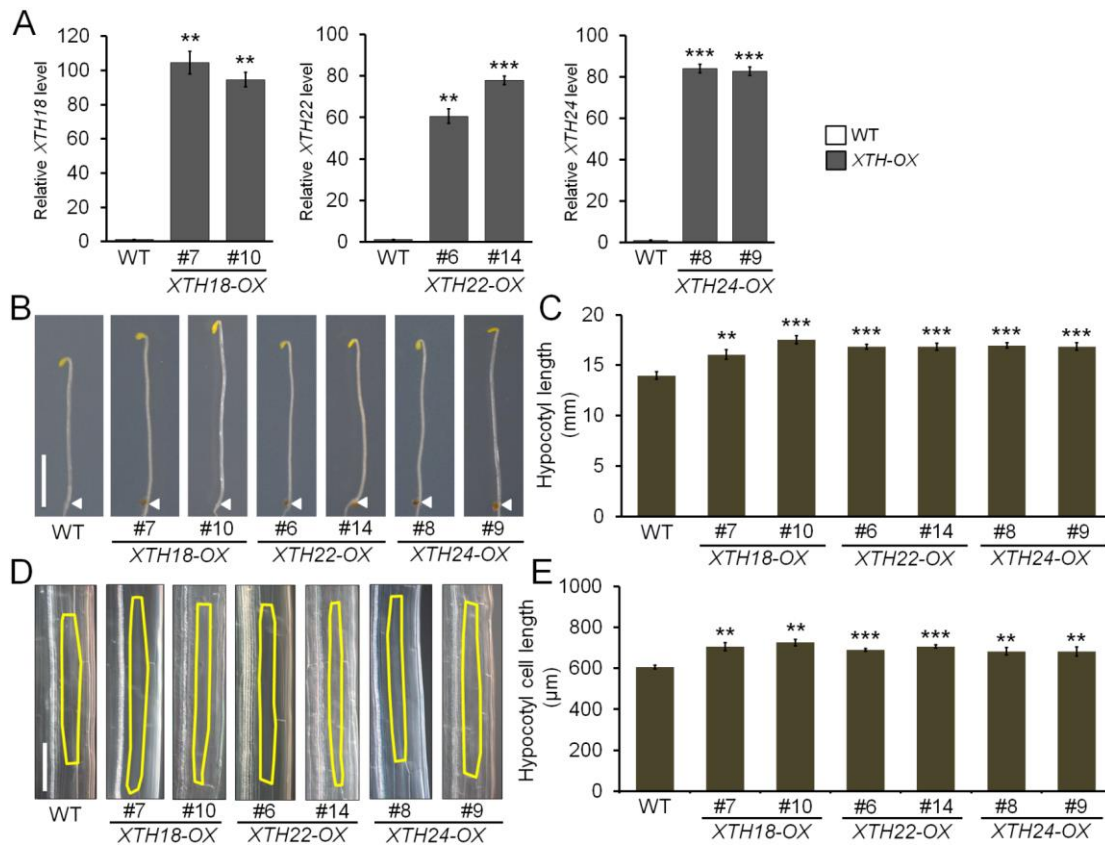

**Supplementary Fig. S9. Overexpression of *XTH18*, *XTH22*, and *XTH24* can promote hypocotyl cell elongation.** (A) The expression of the *XTH* genes were highly up-regulated in the hypocotyls of the etiolated overexpression lines (*XTH18-OX* #7 and #10, *XTH22-OX* #6 and #14, and *XTH24-OX* #8 and #9), respectively. (B and C) Hypocotyl growth of 6-day-old etiolated WT and overexpression seedlings. The white arrowheads indicate the hypocotyl-root junction of the etiolated seedlings. Scale bar = 5 mm. (D and E) Hypocotyl cell elongation of 6-day-old etiolated WT and overexpression seedlings. The yellow borders outline the inner cortex cells. Scale bar = 200 μm. For bar graphs in (C and E), the data are shown as mean ± SEM (n > 30). Statistical significance was determined by Student's *t*-test compared with the WT control. \*\**P* < 0.01; \*\*\**P* < 0.001.

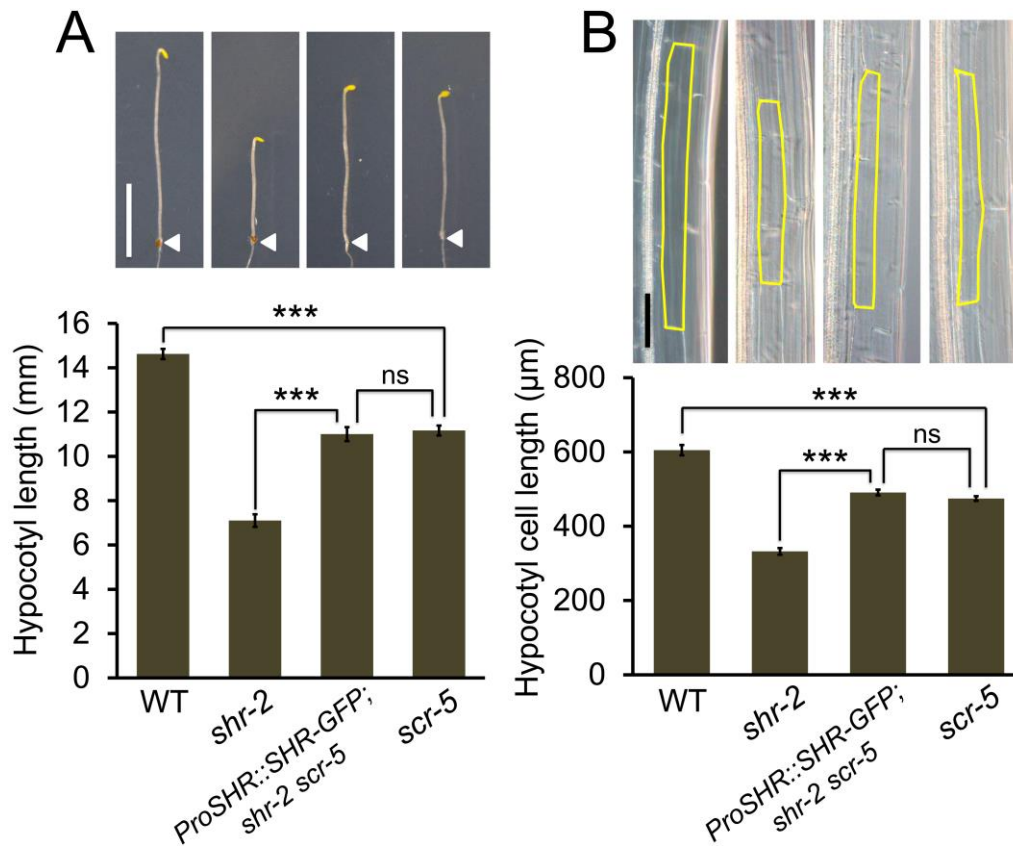

**Supplementary Fig. S10. SHR plays a role in hypocotyl cell elongation in a SCR-independent manner.** (A) Hypocotyl growth of 6-day-old etiolated WT, *shr-2*, *ProSHR::SHR-GFP;shr-2 scr-5*, and *scr-5* seedlings. The *scr-5* seedling also showed a short-hypocotyl phenotype, but its hypocotyl length was longer than that of *shr-2*. The *ProSHR::SHR-GFP* transgene in the *shr-2 scr-5* double mutant could promote hypocotyl growth to the level similar to that of *scr-5*. The white arrowheads indicate the hypocotyl-root junction of the etiolated seedlings. Scale bar = 5 mm. (B) Hypocotyl cell elongation of 6-day-old etiolated WT, *shr-2*, *ProSHR::SHR-GFP;shr-2 scr-5*, and *scr-5* seedlings. The yellow borders outline the inner cortex cells. Scale bar = 100  $\mu\text{m}$ . For bar graphs, the data are shown as mean  $\pm$  SEM ( $n > 30$ ). Statistical significance was determined by Student's *t*-test compared with WT or *shr-2*. \*\*\* $P < 0.001$ ; ns, statistically not significant.

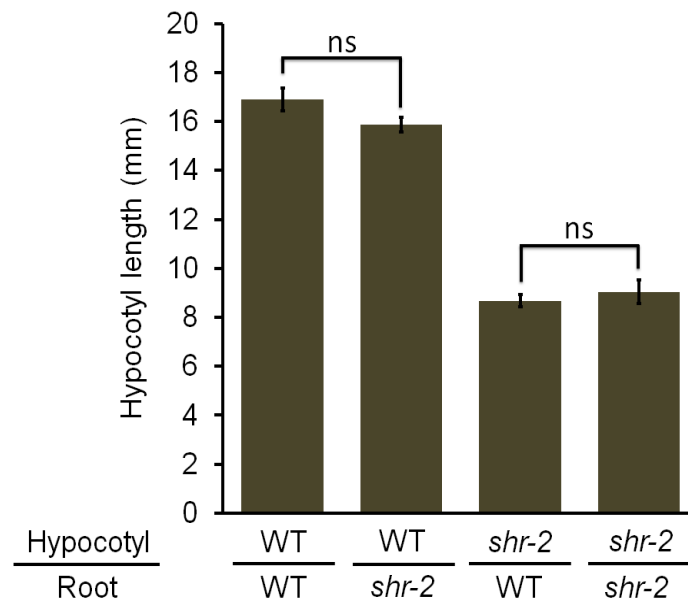

**Supplementary Fig. S11. Arabidopsis graft assay by reciprocally swapping roots and hypocotyls of etiolated WT and *shr-2* seedlings.** The hypocotyl length was measured after grafting WT hypocotyls onto *shr-2* root stocks or vice versa. As control experiments, WT hypocotyls onto WT root stocks and *shr* hypocotyls onto *shr* root stocks were grafted. The data are shown as mean  $\pm$  SEM ( $n > 30$ ). Statistical significance of differences was determined using Student's *t*-test compared with the control experiments. ns, statistically not significant.

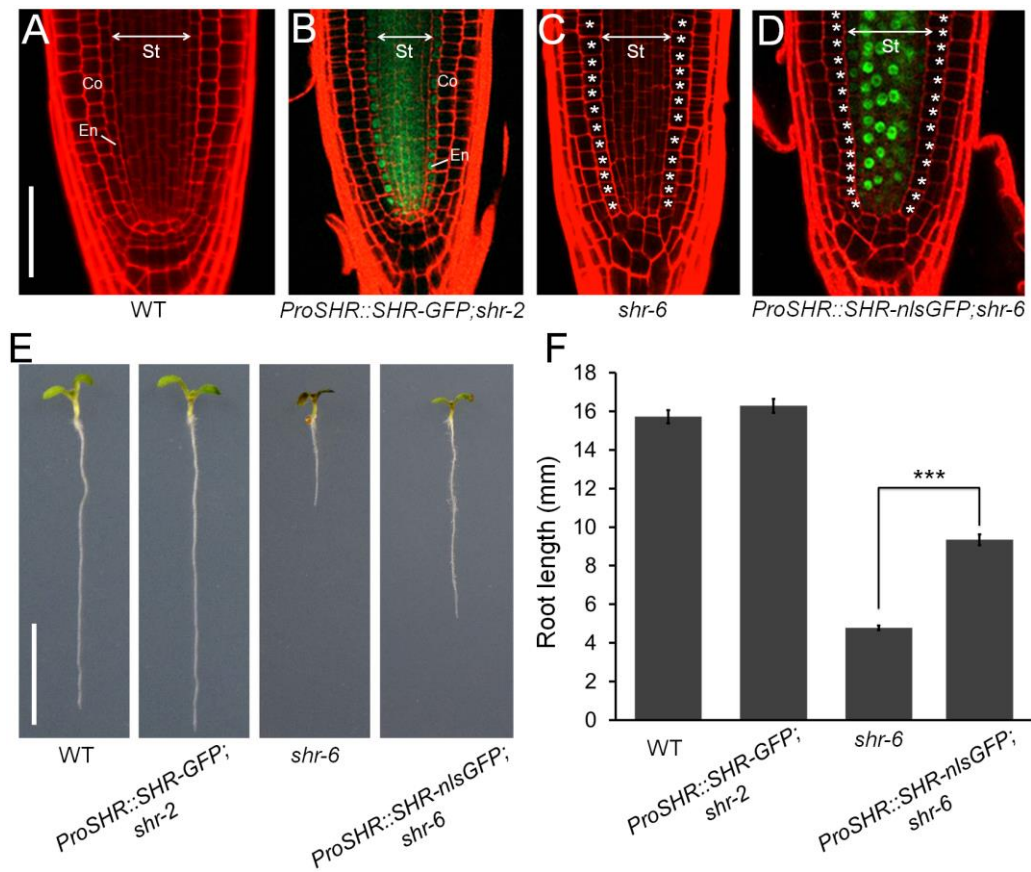

**Supplementary Fig. S12. Restriction of SHR movement is unable to rescue the *shr* root phenotypes.** (A-D) Confocal images of 5-day-old light-grown WT (A), *ProSHR::SHR-GFP;shr-2* (B), *shr-6* (C), and *ProSHR::SHR-nlsGFP;shr-6* (D) roots. The nuclear-localized version of SHR in the stele (*ProSHR::SHR-nlsGFP*) failed to restore the root patterning phenotypes of the *shr* seedlings. The root stele (St) is demarcated by double-headed arrows. In (C and D), the innermost layer of the ground tissue is marked with asterisks. The cortex (Co) and endodermis (En) layers are indicated. Scale bar = 100  $\mu$ m. (E and F) Root growth of 5-day-old light-grown WT, *ProSHR::SHR-GFP;shr-2*, *shr-6*, and *ProSHR::SHR-nlsGFP;shr-6* seedlings. Scale bar = 5 mm. The data are shown as mean  $\pm$  SEM ( $n > 30$ ). Statistical significance was determined by Student's *t*-test compared with *shr-6*. \*\*\* $P < 0.001$ .

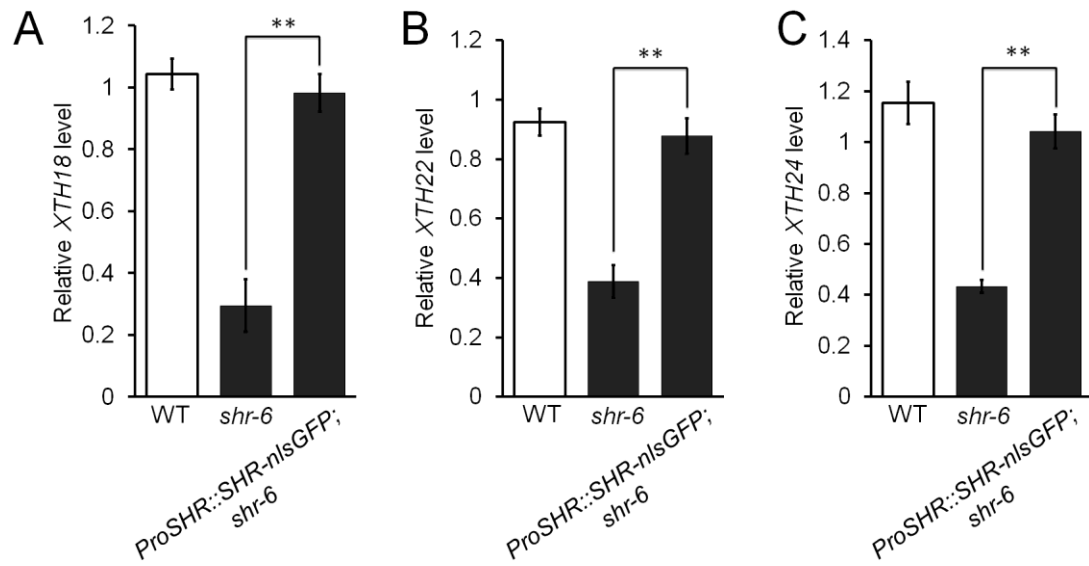

**Supplementary Fig. S13. The stele-localized SHR protein in the hypocotyl is able to induce the expression of *XTH18*, *XTH22*, and *XTH24*.** (A-C) Relative mRNA abundance of *XTH18* (A), *XTH22* (B), and *XTH24* (C) in the etiolated hypocotyls of WT, *shr-6*, and *ProSHR::SHR-nlsGFP;shr-6* seedlings. The *XTH* expression levels were elevated by the nuclear-localized SHR in the stele (*ProSHR::SHR-nlsGFP*). *ACTIN2* was used as an internal control. The data are shown as mean  $\pm$  SEM of three biological replicates. Statistical significance was determined by Student's *t*-test compared with *shr-6*. \*\* $P < 0.01$ .

**Supplementary Table S1.** Sequence information for PCR-genotyping primers

| Purpose        | Name           |                                    | Sequence (5'→3')         | Reference                                   |
|----------------|----------------|------------------------------------|--------------------------|---------------------------------------------|
| Genotyping     | <i>shr-2</i>   | wt F                               | GCCACATCATCAACCCCTTCCT   | Yoon et al., 2016                           |
|                |                | mt F                               | TGGTTGTTACTTTCGAATTCTTCC |                                             |
|                |                | R                                  | GCCTAGCGAATTTCTCCATTC    |                                             |
|                | <i>shr-6</i>   | LP                                 | GCCTAGCGAATTTCTCCATTC    | Yu et al., 2010                             |
|                |                | RP                                 | TCGTTGACAAACTTGTTGGCC    |                                             |
|                | <i>scr-5</i>   | wt F                               | CTCCTCCTCCGATTACAGC      | Heo et al., 2011; Paquette and Benfey, 2005 |
|                |                | mt F                               | CTCCTCCTCCGATTACAGT      |                                             |
|                |                | R                                  | TTGAGTAATCTCGCTGACA      |                                             |
|                | <i>xth18-1</i> | LP                                 | ACTATACGAGTGCATGGGTGG    | This study                                  |
|                |                | RP                                 | CGTGGGCTGTATTCTAGTTGG    |                                             |
|                | <i>xth22-2</i> | LP                                 | AACAAAAACCGCGTGATTTC     |                                             |
|                |                | RP                                 | CAAGAAGACTTGCCGTTTGAC    |                                             |
| <i>xth24-1</i> | LP             | GCTTGTTGTGCATTCTTAGG               |                          |                                             |
|                | RP             | TCCTCACATTCCTACCAAAC               |                          |                                             |
| T-DNA          | SALK           | ATTTTGCCGATTTCGGAAC                | http://signal.salk.edu   |                                             |
|                | SAIL           | GCCTTTTCAGAAATGGATAAATAGCCTTGCTTCC |                          |                                             |

**Supplementary Table S2.** Sequence information for RT-qPCR primers

| Purpose      | Name         |                              | Sequence (5'→3')                | Reference                    |
|--------------|--------------|------------------------------|---------------------------------|------------------------------|
| RT-qPCR      | <i>XTH1</i>  | F                            | ATTGGTCTTTGGCTCCCTTT            | This study                   |
|              |              | R                            | AGGCTTTCTGTTCCGGAGTCA           |                              |
|              | <i>XTH2</i>  | F                            | CCTATGCTCCATTTAAGGCTCAA         | Yokoyama and Nishitani, 2001 |
|              |              | R                            | CATTATTGCTCTGACCATTACGTG        |                              |
|              | <i>XTH3</i>  | F                            | AATTACTGCTTACGAGTTACAAGAGAAGAG  | Lee et al., 2005             |
|              |              | R                            | TCTTATTATCTTCTGCAATCATATAAAAACA |                              |
|              | <i>XTH4</i>  | F                            | GGCTTATCACACTACTCAATCCTTTG      | This study                   |
|              |              | R                            | TTCGGATTGGTATGTTGTCAACA         |                              |
|              | <i>XTH5</i>  | F                            | CTCCTTTTGTGCGCTCCTAC            | This study                   |
|              |              | R                            | AACCCATTTGAGACGCTTGT            |                              |
|              | <i>XTH6</i>  | F                            | CGGTCACCGCTTTCTACATGA           | This study                   |
|              |              | R                            | CAAGAACTCAAAATCTAGCTCGTCTCT     |                              |
|              | <i>XTH7</i>  | F                            | GCAGATTGTCCCGCTAATTC            | This study                   |
|              |              | R                            | GGTGGAACAGGAAAACGAGA            |                              |
|              | <i>XTH8</i>  | F                            | ATAACGACACCGGATGTGGATT          | This study                   |
|              |              | R                            | TTTAGCTTCATACTAAACCATCCGAAT     |                              |
|              | <i>XTH9</i>  | F                            | TTGGGCTACACAAGGAGGTC            | This study                   |
|              |              | R                            | GCTCGAACCCAAATAAGCTG            |                              |
|              | <i>XTH10</i> | F                            | GTCTATGCCGAGGGACTTGA            | This study                   |
|              |              | R                            | GGGTAGGCTACGCCTTTCTCC           |                              |
|              | <i>XTH22</i> | F                            | CTCTAGGCACTCTGTTTCCCA           | This study                   |
|              |              | R                            | ACGAGCCAGTAGTAGTCCCC            |                              |
|              | <i>XTH23</i> | F                            | GATCAACGGCCAGTCTTCAT            | This study                   |
|              |              | R                            | GGAAGACCTTGAGGGAACCT            |                              |
|              | <i>XTH24</i> | F                            | TGACACACCCATTAGAGAGTTAAA        | This study                   |
|              |              | R                            | TCTAGCTTGGCTTGTGAATCCA          |                              |
|              | <i>XTH25</i> | F                            | ACCTCCCCTGTAGCCCACT             | This study                   |
|              |              | R                            | ACTTCCTCTGCACCACTCTCAT          |                              |
|              | <i>XTH26</i> | F                            | GGATCAGTCAGCATCAAGCA            | This study                   |
|              |              | R                            | TCCGGAGGCATAACACCTTTA           |                              |
|              | <i>XTH27</i> | F                            | TATCGAGCAGTTTCCGAGGT            | This study                   |
|              |              | R                            | CTAAGCCTTTGAGCCTCAGC            |                              |
| <i>XTH28</i> | F            | AGTATCCTTTGGTCTCTATCTCACATCA | Lee et al., 2005                |                              |
|              | R            | GCCGTACGTTTGACTTCTCTGA       |                                 |                              |
| <i>XTH29</i> | F            | TAAAGTTTGGTGGTAGTCATCCTAA    | Yokoyama and Nishitani, 2001    |                              |
|              | R            | GATACAACCGGCGTAGACCG         |                                 |                              |
| <i>XTH30</i> | F            | CAAGAAGTCCCCATGGATTG         | This study                      |                              |
|              | R            | ATCTTTCTCAGCCGGAACAA         |                                 |                              |
| <i>XTH31</i> | F            | GATAGCTCTAGTCATGCAG          | This study                      |                              |
|              | R            | TAGACCAAGAAGTTCCTCTGTG       |                                 |                              |
| <i>XTH32</i> | F            | TGGTCCATATGGGATGCTT          | This study                      |                              |
|              | R            | TCATGGCTTGGTGTGTTGT          |                                 |                              |
| <i>XTH33</i> | F            | CAACATTCCGGTTAGGCAGTT        | This study                      |                              |
|              | R            | TAACTCCACGTCAGCAACGGA        |                                 |                              |
| ACTIN2       | F            | TCGCTGACCGTATGAGCAAAGAA      | Yoon et al., 2016               |                              |
|              | R            | TGGAATGTGCTGAGGGAAGCA        |                                 |                              |

**Supplementary Table S3.** Sequence information of primers used in molecular work

| Purpose                          | Name            |   | Sequence (5'→3')                                             |
|----------------------------------|-----------------|---|--------------------------------------------------------------|
| <i>ProXTH18::GUS</i>             | <i>ProXTH18</i> | F | GGGGACAAGTTTGTACAAAAAAGCAGGCTTCATATACGTACAACGATACTTGGGGAT    |
|                                  |                 | R | GGGGACCACTTTGTACAAGAAAGCTGGGTATGGAGGTGATTGATATCTCAAATGT      |
| <i>ProXTH22::GUS</i>             | <i>ProXTH22</i> | F | GGGGACAAGTTTGTACAAAAAAGCAGGCTTCGCGAGGACAAAGACCAAAAA          |
|                                  |                 | R | GGGGACCACTTTGTACAAGAAAGCTGGGTATTCTAGAGATTGTAGATATT           |
| <i>ProXTH24::GUS</i>             | <i>ProXTH24</i> | F | GGGGACAAGTTTGTACAAAAAAGCAGGCTTCAGGCCATAAGATATGGTTAATTACCCTGA |
|                                  |                 | R | GGGGACCACTTTGTACAAGAAAGCTGGGTATGGGTGAACAAAAGGAGGCTAATATCAA   |
| <i>Pro35S::XTH18-OX</i>          | <i>XTH18</i>    | F | CACCATGAAGCTTTCTTGTTGGTAC                                    |
|                                  |                 | R | TTAACTGCACTCTACAGGAA                                         |
| <i>Pro35S::XTH22-OX</i>          | <i>XTH22</i>    | F | CACCATGGCGATCACTTACTTGCTTCC                                  |
|                                  |                 | R | CTATGCAGCTAAGCACTTTTAGGA                                     |
| <i>Pro35S::XTH24-OX</i>          | <i>XTH24</i>    | F | CACCATGTCTCCTTCAAATATT                                       |
|                                  |                 | R | CTATGAGCTTGTGTGCATT                                          |
| <i>ProSHR::SHR-nlsGFP</i>        | <i>ProSHR</i>   | F | GGGGACAAGTTTGTACAAAAAAGCAGGCTCTGTATCGAGACAAACGAGAAAATCATGATG |
|                                  |                 | R | GGGGACAACCTTTGTATAGAAAAGTTGGGTGTGTTGTGTATATTGCATCAGCATC      |
|                                  | <i>SHR</i>      | F | GGGGACAACCTTTCTATACAAAGTTGCTATGGATACTCTTTAGACTAGTCA          |
|                                  |                 | R | GGGGACAACCTTTATTATACAAAGTTGTCGTTGGCCGCCACGCACTAG             |
|                                  | <i>nlsGFP</i>   | F | GGGGACAACCTTTGTATAATAAAGTTGTAATGGAGCAGAAGCTGATCC             |
|                                  |                 | R | GGGGACCACTTTGTACAAGAAAGCTGGGTTCTACCCGGACTTGACAGCTC           |
| Transient expression assay (LUC) | <i>ProXTH18</i> | F | (PSTI) TACTGCAGTGGCTTGTTC AATGTGAAAAAGG                      |
|                                  |                 | R | (BAMHI) TAGGATCCTGGAGGTGATTGATATCTCAAATGT                    |
|                                  | <i>ProXTH22</i> | F | (PSTI) TACTGCAGTAAAAACCAACTTTCCCCC                           |
|                                  |                 | R | (SMAI) TACCCGGGTTTCTAGAGATTGTAGATATT                         |
|                                  | <i>ProXTH24</i> | F | (PSTI) TACTGCAGAGTTGCCCTCATAGACAAACATTAAT                    |
|                                  |                 | R | (BAMHI) TAGGATCCTGGGTGAACAAAAGGAGGCTAATATCAA                 |



Supplementary Table S4. Sequence information for ChIP-qPCR primers

| Purpose                       | Name          |                              | Sequence (5'→3')            |
|-------------------------------|---------------|------------------------------|-----------------------------|
| <i>XTH18</i> promoter regions | -1.9 kb       | F                            | ACAATGAACAATGAGTTCCTCCA     |
|                               |               | R                            | ACTAAGCTTGAAACAAAACCTGGA    |
|                               | -1.6 kb       | F                            | TTCAAGCGCAGTAGGATATAGGT     |
|                               |               | R                            | AAGATGCCAACCTCTATGGAAGCA    |
|                               | -1.4 kb       | F                            | GTTAATGTGCGGATATTTAGTTGAT   |
|                               |               | R                            | ACGATACAAAAGAGCATAATAGTCGT  |
|                               | -1.2 kb       | F                            | TAAACTATACGAGTGCATGGGT      |
|                               |               | R                            | AGTTTTCTTTACTCGTTACTGTTACA  |
|                               | -0.8 kb       | F                            | TGGCTTGTTCATGTAAGAAAAGG     |
|                               |               | R                            | TTGACACGTTTAGTGCGTAGGAA     |
|                               | -0.5 kb       | F                            | TGGGAGATCGATTAACCAAAAAGA    |
|                               |               | R                            | TGTTCTAATCCTTAGATAAACACCA   |
|                               | -0.3 kb       | F                            | TGCAAATATATTTGTCATTCGAACCT  |
|                               |               | R                            | TGCTGGTCCCAGCGTTGAGATT      |
| <i>XTH22</i> promoter regions | -2.1 kb       | F                            | GCGAGGACAAAGACCAAAAA        |
|                               |               | R                            | AATTTGGACGTTTAATACCCAAT     |
|                               | -1.8 kb       | F                            | TTGGGTATTAACGTCCAAATTA      |
|                               |               | R                            | CCGGTTAGCAGATTAATGACG       |
|                               | -1.4 kb       | F                            | GCAAGTCAACTAGACGAGACGA      |
|                               |               | R                            | TTTGCTAATTCGGGGGTTA         |
|                               | -1.2 kb       | F                            | CACCGCGTCATGAAATTAT         |
|                               |               | R                            | ACTTGGTTGGTTGGTTACGG        |
| -0.9 kb                       | F             | ACCGTAACCAACCAACCAAG         |                             |
|                               | R             | TTTTTGTTGCTCATATTTGAGTTT     |                             |
| -0.4 kb                       | F             | TAAAAACCAACACTTTCCCCC        |                             |
|                               | R             | CTTGGACCGACCTTGACAGA         |                             |
| <i>XTH24</i> promoter regions | -2.4 kb       | F                            | TACAGCTGTAAAGTAGTGGGA       |
|                               |               | R                            | AGCTACGTAATTAAGCAAACACT     |
|                               | -2.1 kb       | F                            | TGGTTTATCATTATGTTACGGAAG    |
|                               |               | R                            | ATCATACTGAGTTTTACATCATTGCC  |
|                               | -1.7 kb       | F                            | AGTTGCCCTCATAGACAAACATTAAT  |
|                               |               | R                            | ACAGCTGTCCACAGTACTTAA       |
|                               | -1.4 kb       | F                            | TACATGTATATCTCAGTGGTTCCGTT  |
|                               |               | R                            | TGTGCAACCATACTATAGGTCTA     |
|                               | -1.0 kb       | F                            | CTCATTTCAATTCACACAATAATATGG |
|                               |               | R                            | AAGCTTACATTTGTTGGCA         |
| -0.6 kb                       | F             | AGATGCAACCAATTATATAGCAAACGAT |                             |
|                               | R             | ATTGAGACAGACTTTTTGACGTAAA    |                             |
| -0.4 kb                       | F             | ATTTTAGTCGGTCATCAGTATCGT     |                             |
|                               | R             | AGCAGATTATGTTTACCATCCTTA     |                             |
| <i>SCR</i> promoter region    | <i>ProSCR</i> | F                            | CGTCTTGCCAATTCCTCTCA        |
|                               |               | R                            | TCAAAGTGTGGTACGATGTGC       |
